23 **Running title:** Role of melanin on cuticle defects

24 **Keywords:** Melanic coloring; Cuticle features; Cuticular protein-encoding genes;

25 Induction; *Bombyx mori*

26 <sup>1</sup> **Corresponding Authors:**

27 **Liang Qiao**, Chongqing Key Laboratory of Vector Insects, Institute of Entomology

28 and Molecular Biology, College of Life Sciences, Chongqing Normal University, No.

29 37 Daxuecheng Road, Chongqing, 401331, China; E-mail: qiaoliangswu@163.com;

30 Tel: 86-23-65910315

31 **Fang-yin Dai**, State Key Laboratory of Silkworm Genome Biology, Key Laboratory

32 for Sericulture Functional Genomics and Biotechnology of Agricultural Ministry,

33 Southwest University, No. 2 Tiansheng Road, Chongqing, +86-23-68400715, China;

34 E-mail: fydai@swu.edu.cn; Tel: 86-23-68250346

35

36

37

38

39

40

41

42

43

44

45 **Abstract**

46 Melanin and cuticular proteins are important cuticle components in insect. The  
47 cuticle defects caused by the loss function of cuticular protein-encoding genes could  
48 hinder melanin deposition. However, the effects of melanin variation on cuticular  
49 protein-encoding genes and the corresponding morphological traits associated with  
50 these genes remain largely unknown. Using *Bombyx mori* as a model, we showed that  
51 the level of melanism during larval cuticle pigmentation correlated positively with the  
52 expression of cuticular protein-encoding genes. This correlation stemmed from the  
53 simultaneous induction of these genes by the melanin precursors. More importantly,  
54 the effect of the melanism background on the cuticle induced the up-regulation of  
55 other functionally redundant cuticular protein-encoding genes to rescue the  
56 morphological and adaptive defects caused by the dysfunction of some mutated  
57 cuticular proteins, and the restorative ability increased with increasing melanism  
58 levels, which gives a novel evidence that melanism enhances insect adaptability.  
59 These findings deepen our understanding of the interactions among cuticle  
60 components, as well as their importance in the stabilization of the normal morphology  
61 and function of the cuticle.

62

63 **Introduction**

64 The prerequisite for the benefits of melanism to insect is not only the integrity of  
65 the melanin biosynthesis and regulatory pathway (Wilson *et al.* 2001; Liu *et al.* 2015;  
66 Mallet and Hoekstra 2016), but also the normal presence of the platform it relied on

67 (Wittkopp *et al.* 2003; Wittkopp and Beldade 2009; Andersen 2010; Moussian 2010;  
68 Van Belleghem *et al.* 2017). For the insects, the most important fundamental platform  
69 for the color pattern drawing is the cuticle (Hopkins and Kramer 1992; Andersen 2010;  
70 Moussian 2010). During shaping the cuticle, the maintenance and stability of the  
71 cuticle features depends on normal functional cuticular proteins and the interactions  
72 with other components (Hopkins and Kramer 1992; Guan *et al.* 2006; Suderman *et al.*  
73 2006; Andersen 2010; Moussian 2010; Chaudhari *et al.* 2011; Noh *et al.* 2016). Due  
74 to the crucial roles of cuticular proteins on cuticle development, when their coding  
75 genes are loss of function, the abnormal or defective cuticle will likely affect the  
76 deposition and attachment of melanin, which is not conducive to the performance of  
77 color pattern (Kanekatsu *et al.* 1988; Oota and Kanekatsu 1993; Arakane *et al.* 2012;  
78 Jasrapuria *et al.* 2012; Wang 2013; Noh *et al.* 2015). Yet little is known about the  
79 corresponding response mode of cuticular protein-encoding genes via the alteration of  
80 the melanin biosynthesis or regulatory pathway.

81 Recently, several high throughput expression surveys showed that the abundance of  
82 cuticular protein-encoding genes in different colored integuments varied in some  
83 insect species, especially with evidently up-regulated in the melanic regions  
84 (Futahashi *et al.* 2012; He *et al.* 2016; Wu *et al.* 2016; Tajiri 2017), and some of those  
85 shared very similar expression patterns and functions (Nakato *et al.* 1994; Nakato *et*  
86 *al.* 1997; Shofuda *et al.* 1999; Okamoto *et al.* 2008; Liang *et al.* 2010; Tang *et al.*  
87 2010; Qiao *et al.* 2014). These studies implied that there are probably some  
88 relationships between the promotion of melanism and the expression of cuticular

89 protein-encoding genes. Prior to this study, further exploring and understanding of the  
90 potential relationships were unclear. Additionally, when melanism-promoting  
91 instructions and defective cuticle proteins occur simultaneously, what are the effects  
92 of their relationships on the presence of the corresponding morphological traits ?

93 In the Lepidoptera model, *Bombyx mori*, an intriguing phenomenon has been  
94 reported that a larval melanic mutant, *Striped* ( $p^S$ , 2-0.0) is able to rehabilitate the  
95 malformed body shape, as well as the adaptability defects of the *stony* mutant (*st*,  
96 8-0.0) (Xiang 1995; Banno *et al.* 2005). A recent study clarified that a transcription  
97 factor, *Apontic-like*, which boosts the expression of melanin synthesis genes in  
98 epidermal cells, is responsible for the  $p^S$  mutant (Yoda *et al.* 2014). Besides this, there  
99 are also multiple alleles with different melanism degrees at the *p* locus, including  $p^B$ ,  
100  $p^M$ , *etc* (Xiang 1995; Banno *et al.* 2005; Yoda *et al.* 2014). And the *stony* mutant (*st*,  
101 8-0.0) which precisely caused by the deletion of a RR1-type larval cuticular  
102 protein-encoding gene, *BmLcp17* (or *BmorCPR2*) showed hard and tight touch feeling,  
103 uncoordinated ratios of the length of the internodes and the intersegment folds (I/IF),  
104 bulges at intersegment folds, and severely defective locomotion and behavioral  
105 activities in the larval stage (Qiao *et al.* 2014). In addition, the similarity of the gene  
106 expression patterns and functional characteristics among some members of the  
107 RR1-type larval cuticular protein-encoding gene family, such as *BmLcp18*, *BmLcp22*,  
108 *BmLcp30* also suggest that they may play very similar roles as *BmLcp17* in shaping  
109 the larvae cuticle (Nakato *et al.* 1994; Nakato *et al.* 1997; Shofuda *et al.* 1999;  
110 Okamoto *et al.* 2008; Liang *et al.* 2010; Tang *et al.* 2010; Qiao *et al.* 2014). These

111 dispersed findings are linked through the epistasis of  $p^S$  to *stony*, then provide the  
112 breakthrough and the exceptional genetic resources for exploring the interactions  
113 between melanin and cuticular protein-encoding genes.

114 Here we illustrated that the transcripts levels of four cuticular protein-encoding  
115 genes were positively correlated with the melanism degree of larval cuticle, which  
116 were due to the simultaneous induction these genes by the intracellular melanin  
117 precursors. Moreover, by importing melanism-promoting instruction into the *stony*  
118 mutant, the cuticle deficiency rescued through functionally redundant compensation  
119 by some other up-regulated cuticular protein-encoding genes, which a new evidence  
120 that melanism as a beneficial trait. These findings deepen our understanding of the  
121 interactions among genetic factors which shape morphological features in  
122 lepidopteran, and emphasize the ecological and evolutionary significance of these  
123 mutual interactions.

124

## 125 **Materials and Methods**

### 126 *Silkworm strains*

127 Wild-type strains Dazao (+<sup>p</sup>) and melanic mutant strains  $p^M$ ,  $p^S$  and  $p^B$  (Xiang 1995;  
128 Banno *et al.* 2005; Yoda *et al.* 2014) were analyzed in this study. The darkness of  
129 pigment was measured as mean OD value using Image J (<https://imagej.nih.gov/ij/>).  
130 In terms of melanism degree, the body color of an individual that is homozygous at  
131 one of the aforementioned melanic loci is darker than that of a heterozygous  
132 individual (Xiang 1995; Banno *et al.* 2005). The albinism mutant *albino* (*al*) (Banno

133 *et al.* 2005; Fujii *et al.* 2013), non-diapause wild-type strain N4 (used for melanin  
134 inhibition treatment) and *BmLcp17* deletion strain Dazao-*stony* (near isogenic line of  
135 Dazao, which have been backcrossed with Dazao over 26 generations) were supplied  
136 by the Silkworm Gene Bank in Southwest University. The *al* mutant was fed with  
137 artificial die at 28°C, and the others were fed fresh mulberry leaves under a  
138 12□h/12□h light/dark photoperiod at 24□°C.

### 139 ***Chemicals and cell lines***

140 L-dopa (D9628), dopamine (H8502), tetrahydrofolic acid (BH<sub>4</sub>) (T3125) and  
141 2,4-Diamino-6-hydroxypyrimidine (DAHP) (D19206) were purchased from  
142 Sigma-Aldrich (St. Louis, MO, USA). *BmNs* cell line was kept in our laboratory.

### 143 ***Mating combinations and progeny phenotypes identification***

144 The  $p^S$  and  $p^M$  strains were crossed with the Dazao-*stony* strain to generate the F<sub>1</sub>  
145 generation, respectively. The F<sub>2</sub> generation were produced by an F<sub>1</sub> self-cross, and  
146 individuals of day 5 of the fifth-instar were collected to further use. The  $p^B$  strain was  
147 crossed with the Dazao-*stony* strain to generate F<sub>1</sub> progeny, which mated with the  
148 Dazao-*stony* strain to generate the BC<sub>1</sub> generation, and fed them until at day 5 of the  
149 fifth-instar. Firstly, individuals of the F<sub>2</sub> or BC<sub>1</sub> generations were separated by their  
150 cuticle pigmentation. Subsequently, their phenotypes were further classified by  
151 morphological characteristics, touch feeling, and the ratios between the number of  
152 internodes and intersegmental folds in the second, third, and fourth abdominal  
153 segments based on a earlier method (Qiao *et al.* 2014).

### 154 ***Genotyping***

155 Because the  $p^S$ ,  $p^M$  and  $p^B$  mutations are multiple alleles at the  $p$  locus, they should  
156 be located in proximity each other on the chromosome 2 (Xiang 1995; Banno *et al.*  
157 2005; Yoda *et al.* 2014). Based on the reported sequence of the gene corresponding to  
158 the  $p^S$  allele, a polymerase chain reaction (PCR)-based molecular marker within of the  
159 genomic region of the *Apontic-like* was designed. PCR screening were performed in  
160 the  $p^X$  ( $X=M, S$  and  $B$ ) and *Dazao-stony* to obtain the polymorphism molecular marker  
161 for  $p$  locus. Similarly, molecular marker was also designed within genomic region of  
162 the *BmLcp17* for polymorphism screening of the *stony* locus. The primers used in this  
163 study are listed in Table S1.

#### 164 ***Association analysis of gene expression, phenotype and genotype***

165 Day 5 fifth-instar larvae of the *Dazao* or *Dazao-stony* strains were selected for  
166 cuticle dissection. The cuticles of the semi-lunar marking region and the non-melanic  
167 portion between the paired semi-lunar marking were finely dissected. Then, gene  
168 expression levels of *BmLcp17*, *BmLcp18*, *BmLcp22* and *BmLcp30* in these regions  
169 were compared. Gene expression patterns in the dorsal epidermis of abdominal  
170 segments (from semi-lunar marking to star marking) from day 5 of fifth instar larvae  
171 (*Dazao*,  $p^S/+$ ,  $p^M/+$ ,  $p^B/+$ ). Similarly, day 1 of second instar larvae of the *al* and *Dazao*  
172 strains were also investigated. In addition, the same regions of dorsal epidermis were  
173 collected from F<sub>2</sub> generation individuals with the  $p^S/p^S$ , *st/st*, and  $p^S/+$ , *st/st* genotypes,  
174 as well as the  $p^M/p^M$ , *st/st* and  $p^M/+$ , *st/st* genotypes for gene expression analyses. For  
175 all genotyped individuals, the ratios of the length of the intersegment and the  
176 intersegment fold were also analysed using image J.



177 ***Melanin precursors-promoting and inhibition treatments***

178 The preparation and concentration of L-dopa and dopamine solutions were slightly  
179 modified according to the description by Futahashi (Futahashi and Fujiwara 2005),  
180 and filtered with a 0.22  $\mu\text{m}$  filter prior to use. Cells were washed three times with  
181 Grace medium without melanin precursors to remove metabolites and other  
182 contaminants on the cell surface. Then, 0.8mL medium containing L-dopa or  
183 dopamine was added separately into each well, and the medium without melanin  
184 precursors was used as the control. The plate was sealed with tape, wrapped with foil  
185 and incubated at 28°C for 24 h for a gene expression analysis. In BH<sub>4</sub> feeding assays,  
186 the 30mM working solution was prepared by dissolving tetrahydrofolic acid into  
187 ddH<sub>2</sub>O, and then smeared on the artificial diet to feed the *al* mutant, and ddH<sub>2</sub>O was  
188 used as the control. Phenotype were observed and recorded from the second instar and  
189 the expression of cuticular protein-encoding genes was also analysed. For the  
190 melanism-inhibition experiment, the wild-type strain N4 was selected. Newly-hatched  
191 larvae were divided into treatment and control groups. Individuals in the treatment  
192 group fed with DAHP dissolved in 0.1M NaOH (15g/L), and individuals in the  
193 control group fed 0.1M with NaOH. Phenotypes observation and gene expressions  
194 detection were performed on day 1 of the second-instar larvae.

195 ***Quantitative RT-PCR***

196 Total RNA extraction, reverse transcription and qRT-PCR conducted as described  
197 previously (Qiao *et al.* 2014). Three biological replicates were prepared for each  
198 condition, and *BmRPL3* was used as the internal control. Primers are listed in Table

199 S1.

200

## 201 **Results**

### 202 *Entirely distinct expression patterns of cuticular protein-encoding genes and the* 203 *cuticle appearance between melanic and non-melanic regions*

204 The expression patterns of *BmLcp17*, *BmLcp18*, *BmLcp22* and *BmLcp30* in melanic  
205 or non-melanic epidermal regions are shown in Figure 1. These results, together with  
206 earlier studies (Futahashi *et al.* 2012; He *et al.* 2016; Wu *et al.* 2016), revealed that the  
207 gene expressions were significantly higher in melanic parts of the cuticle than in  
208 non-melanic parts. Moreover, micro protrusions were more intensive in the melanic  
209 regions than in the non-melanic regions, and accompanied by a higher chitin content  
210 (another important cuticle component (Hopkins and Kramer 1992; Moussian *et al.*  
211 2006; Andersen 2010; Moussian 2010; Chaudhari *et al.* 2011; Qiao *et al.* 2014), and  
212 the reduction chitin content was reported to impede cuticle melanism (Moussian *et al.*  
213 2005)) (Figure S1A). These results showed that, regardless of the different genetic  
214 basis of the melanic mutants or the melanic markings in the non-melanic strains,  
215 excessive accumulation of melanin in the cuticle (accompany by the changes in the  
216 surface structure and the chitin content of the melanic cuticle) was closely related to  
217 the high expression levels of the cuticular protein-encoding genes.

### 218 *Expression level of larval cuticular protein-encoding genes positively correlated* 219 *with the degree of cuticle melanism*

220 To obtain further insights into the relationships between the accumulation of

221 melanin and the expression of cuticular protein-encoding genes, we investigated gene  
222 expression patterns using four different mutations at the  $p$  locus ( $Dazao (+^p)$ ,  $p^M$ ,  $p^S$   
223 and  $p^B$ ), which showed gradually increasing melanin accumulation (Figure 2A). Our  
224 results revealed that the gene expression levels were gradually and significantly  
225 up-regulated with the increase in the degree of melanism of the cuticle (Figure 2B).  
226 They further showed that the expression levels correlated positively with the degree of  
227 melanism. Thus, the quantities of cuticular proteins with similar or redundant  
228 functions could be increased greatly by the increasing the degree of melanism.

229 ***Typical stony phenotyped individuals masked after the introduction of melanic loci***  
230 ***into the *BmLcp17* defection strain***

231 We assessed the effects of modulating the melanic background on the phenotypic  
232 defects caused by the deletion of *BmLcp17*. After mating the  $p^B$  and *stony* parental,  
233 the percentage of BC<sub>1</sub> individuals with melanism and the normal body shape in the  
234 backcrossed population of the  $p^B \times stony$  cross was 52 % (290/553; and theoretically, it  
235 was 25 %), yet individuals with the melanism cuticle and *stony*-type body shape were  
236 not found (theoretically should be almost equivalent to the number of individuals with  
237 melanism cuticle and normal body shape) (Figure 3). In the cross of  $p^S \times stony$ , ~10.8%  
238 (36/331) of F<sub>2</sub> progeny had an lighter melanism body color and smaller body size  
239 (Figure 3). These individuals exhibited a little hard and tight touched body, but the  
240 body was much softer than that of the *stony* mutant. Their intersegment folds bulged  
241 slightly, and the length were significantly shorter than that of the internodes;  
242 accordingly, their phenotypes slightly resembled the morphological features of the

243 *stony* mutant (Figure 3 and 4A). Even so, We did not find individuals with the typical  
244 *stony*-type body shape and also defective adaptability under the melanism background  
245 (theoretical ratio is 3/16). (Figure 3). Similarly, in the  $p^M \times stony$  corss, only  
246 approximately ~11.7% (51/437) of the individuals of the F<sub>2</sub> population were very  
247 lightly melanic, but they exhibited obviously unusual morphological features (Figure  
248 3, Figure 4A). When compared with the ~10.8% F<sub>2</sub> individuals (aforementioned) from  
249 the  $p^S \times stony$  cross, the touch feelings of individuals from the  $p^M \times stony$  cross were  
250 tighter and firmer, and the intersegment folds bulged more obviously and had a higher  
251 proportion among the segments, meaning that their body features were closer to the  
252 phenotype of the *stony* mutant (Figure 3 and 4A) (Qiao *et al.* 2014). Nevertheless,  
253 melanic individuals showing the typical *stony*-type body features and defective  
254 adaptability still did not appear (theoretical ratio is 3/16) in the progeny from the  $p^M \times$   
255 *stony* cross. Therefore, induction of the melanic mutation into individuals with a  
256 defective cuticular protein-encoding gene could mask the adverse phenotypes, and the  
257 masking effect was more remarkable with the increasing degree of melanism.

258 ***Other larval cuticular protein-encoding genes up-regulated evidently in the melanic***  
259 ***and non-stony phenotypic, but with mutated BmLcp17 genotypic offspring***

260 Using the molecular markers (closely linked to the *p* and *st* loci, respectively), we  
261 further genotyped the progenies with melanic color pattern and non-*stony* (including  
262 ambiguous *stony*-like) body shape. The results revealed that approximately 49% of  
263 the individuals showing a melanic color and normal body shape in the BC<sub>1</sub> population  
264 from the  $p^B \times stony$  cross was the  $p^B/+^{pB}$ , *st/st* genotype (Figure 4A). The ratios of the

265 length of the internodes and the intersegment folds (I/IF) were  $\sim 4$ , which is very  
266 similar to that in  $p^B/+^{pB}, +^{st}/st$  individuals, and also no significant differences as that in  
267 the wild-type individuals (Figure 4B) (Qiao *et al.* 2014). In the  $F_2$  generation from the  
268  $p^S \times stony$  cross, approximately 9.3% of the individuals with the  $p^S/p^S, st/st$  genotype  
269 and very few individuals ( $\sim 1\%$ ) with the genotype  $p^{S/+^{pS}}, st/st$  exhibited a melanic  
270 color and the normal body shape (Figure 4A). For  $p^S/p^S, st/st$  genotyped individuals,  
271 the I/IF value was approximately 3.3 (Figure 4B). Although the I/IF value was lower  
272 than that in  $p^S/_, +^{st}/_$  individuals (approximately 4, Figure 4B), it was much higher  
273 than that in the *stony* mutant (approximately 1.6 (Qiao *et al.* 2014)). Despite the  
274 slightly smaller body size of the  $p^S/p^S, st/st$  individuals, their body shape was  
275 essentially normal (Figure 4A). The genotypes of those lightly melanic individuals,  
276 whose body shape was slightly like that of the *stony* phenotype (mentioned in Result  
277 3), were all the  $p^{S/+^{pS}}, st/st$ , and the I/IF value of these individuals was approximately  
278 2.7 (Figures 4A and 4B). In progeny of the  $p^M \times stony$  cross,  $\sim 10.5\%$  of the individuals  
279 with the  $p^M/p^M, st/st$  genotype and  $\sim 0.7\%$  of the individuals with the  $p^{M/+^{pM}}, st/st$   
280 genotype showed a melanic color and subtle *stony* features (just very slight bulges)  
281 (Figure 4A). The body size of the  $p^M/p^M, st/st$  individuals were smaller than those of  
282 the  $p^M/_, +^{st}/_$  individuals. They exhibited a certain sense of hardness, and the I/IF  
283 ratio was approximately 2.8, which is in good agreement with their phenotypes  
284 (Figure 4B). Additionally, individuals showing very slight melanism and  
285 morphological features that were more similar to that of the *stony* mutant (mentioned  
286 in Result 3) were all the  $p^{M/+^{pM}}, st/st$  genotype, and their I/IF values were

287 approximately 1.8, which is closer to that of the *stony* mutant (Figures 4A and 4B). In  
288 addition, the expression of cuticular protein-encoding genes in  $p^S/p^S, st/st$  individuals  
289 were significantly higher than that in  $p^S/+^{pS}, st/st$  individuals (Figure. 4C); a similar  
290 result was also obtained from the  $p^M/p^M, st/st$  and  $p^M/+^{pM}, st/st$  individuals (Figure 4C).  
291 Taken together, these results revealed that more cuticular proteins with similar  
292 functions were accumulated in the cuticle of melanic homologous individuals at the *p*  
293 locus. Based on the comprehensive and association analysis, we infer that melanic  
294 background effectively drove the expressions of cuticular protein-encoding genes  
295 with similar expression patterns and redundant functions, which compensated for the  
296 morphological and adaptability defects caused by the dysfunctional *BmLcp17* gene;  
297 and the law of compensatory abilities was  $p^{B/+^{pB}}, st/st > p^S/p^S, st/st > p^M/p^M, st/st$  ✖  
298  $p^S/+^{pS}, st/st > p^M/+^{pM}, st/st$ , which corresponds well with the gradual weakening of the  
299 degree of melanism (Figures 4 and Figure S3).

300 ***Content variations of melanin precursors affect the transcript amount of the***  
301 ***cuticular protein-encoding genes***

302 Due to the crucial material basis for the cuticle melanism (no matter what kind of  
303 genetic basis caused by) is the extensive accumulation of melanin precursors in the  
304 epidermal cells; thus, the essence that melanism tend to increase the expression of  
305 some cuticular protein-encoding genes should be driven by the relations between the  
306 accumulation of melanin precursors and the transcripts amount of the cuticular  
307 protein-encoding genes. The basal expressions of four cuticular protein-encoding  
308 genes were detected in *BmNs* cells (Figure S5), indicating that there are regulatory

309 pathways controlling the expression of cuticular protein-coding genes in this cell line;  
310 therefore, this cell line can be used to examine the effect of melanin precursors on  
311 gene expressions. After incubating *BmNs* cells with melanin precursors, the  
312 expression of cuticular protein-encoding genes was significantly higher in cells  
313 treated either by L-dopa or dopamine, compare with that in the control group (Figure  
314 5 top (left)). In addition, when treated with BH<sub>4</sub>, the second-instar *al* mutant (which is  
315 characterized by albinism and a porous cuticle due to a mutation of sepiapterin  
316 reductase, which leads to the insufficient synthesis of the co-factor BH<sub>4</sub> during the  
317 synthesis of melanin precursors (Banno *et al.* 2005; Fujii *et al.* 2013) was rescued to a  
318 melanic body color (Lab unpublished contribution) (Fujii *et al.* 2013), and the gene  
319 expressions were obviously higher than that in the control group (Figure 5 top (right)).  
320 These results suggest that the expression of cuticular protein-encoding genes can be  
321 induced by increasing amounts of melanin precursors. Furthermore, adding DAHP (an  
322 inhibitor of guanylate cyclase hydrolase (GTPCHI), which is an important  
323 rate-limiting enzyme in the synthesis of BH<sub>4</sub> (Hamadate *et al.* 2008), inhibited the  
324 synthesis of BH<sub>4</sub> in wild-type second-instar larvae by blocking the synthesis of  
325 melanin precursors in epidermal cells, which caused individuals to lose their original  
326 melanic body color (Lab unpublished contribution). The gene expressions were also  
327 significantly reduced when compared with that in the control group (Figure 5 bottom).  
328 Thus, the content and variation of the intracellular melanin precursors are important  
329 factors regulating the expression of cuticular protein-encoding genes. We concluded  
330 that the inducing effect of the melanin precursors on the expression of cuticular

331 protein-encoding genes is the basis for melanism promoting genes' transcription.

332

### 333 **Discussion**

334 Melanin is deposited in the cuticle, in which many of cuticular proteins also occur;  
335 thus, overlapping distribution of cuticular proteins make it possible for them to  
336 interact with melanin, thereby contributing to the phenotype of the cuticle (Hopkins  
337 and Kramer 1992; Suderman *et al.* 2006; Andersen 2010; Moussian 2010; Hu *et al.*  
338 2013). We clearly observed that extensive star-like protrusions were present on the  
339 cuticle when a large amount of melanin accumulated (Figure S1). Similar correlations  
340 between cuticle structure and body color have been reported multiple times (Futahashi  
341 *et al.* 2012; Noh *et al.* 2016; Tan *et al.* 2016), suggest that there should be some  
342 interactions between cuticular proteins and melanin. Although the exact interaction  
343 pattern between these two cuticular components is unknown, microscopic observation  
344 clearly shows that the deposition of an excessive amount of melanin affected the  
345 cuticle characteristics.

346 The expression profile of cuticular protein-encoding genes in melanic silkworm  
347 mutants and the black markings of *Papilio* larvae supported the view that  
348 overexpressed cuticular proteins probably participate in the transport or maintenance  
349 of the corresponding pigments in a specific painted cuticle (Figures 1, 2 and Figure S1)  
350 (Futahashi *et al.* 2012; He *et al.* 2016; Wu *et al.* 2016). Yet over-expression of  
351 cuticular protein-encoding genes *in vivo* cannot trigger (or induce) the formation of  
352 the melanic cuticle (Tajiri *et al.* 2017). Therefore, we reasoned that once the



353 instructions for melanin accumulation are included in the developmental program  
354 (melanism being the original factor), other cuticle features and structures should adapt  
355 to the level of melanin accumulation, regardless of genetic background. The  
356 up-regulation of cuticular protein-encoding genes should be a necessary adaptation for  
357 the maintenance and stability of the structural characteristics and physical properties  
358 of melanic cuticles. The interactions of melanin and cuticular proteins at the  
359 ultrastructural level deserves special attention in follow-up studies.

360 Despite the elaborate regulatory mechanism by which melanin precursors affect the  
361 expression of cuticular protein-encoding genes is unclear, this study really revealed  
362 the existence of this regulatory phenomenon (Figure 5). Cuticle formation is regulated  
363 stringently in temporal and spatial patterns, the accumulation and oxidization of  
364 melanin precursors, and the interactions (such as cross-linking) among other  
365 components should occur after the formation of the initial formation of the cuticle  
366 (Moussian 2010; Sobala and Adler 2016; Tajiri 2017). Therefore, we propose that the  
367 cuticular proteins induced by melanin precursors are used to set up a platform for  
368 further accumulation and oxidization of melanin precursors. When melanin-associated  
369 protein-encoding genes have similar expression patterns and functions (Nakato *et al.*  
370 1994; Nakato *et al.* 1997; Shofuda *et al.* 1999; Okamoto *et al.* 2008; Liang *et al.* 2010;  
371 Tang *et al.* 2010; Qiao *et al.* 2014), the production of a large amount of functionally  
372 similar cuticular proteins would be driven by the melanic background to guarantee  
373 construction and stability of the melanic cuticle. During this process, melanism  
374 unlocks the complementary features of melanin-associated cuticular proteins (such as

375 *BmLcp18*, *BmLcp22*, *BmLcp30*), rescued cuticular malformation caused by the loss of  
376 function of some cuticular proteins (such as defected *BmLcp17* in *stony* mutant).  
377 Because it appears that a special cuticle-forming pattern is regulated by melanin  
378 accumulation, melanism may enhance insect adaptability to avoid the impairment of  
379 survival caused by the mutation and/or functional loss of some cuticular proteins, and  
380 these results also add new evidence to explain how melanism can be a beneficial trait  
381 (Wilson *et al.* 2001; True 2003; Wittkopp *et al.* 2003; Wittkopp and Beldade 2009;  
382 Liu *et al.* 2015; Mallet and Hoekstra 2016).

383 As far as we known, as structural proteins, there is no evidence to suggest that the  
384 four larval cuticular protein-encoding genes and their orthologous can enter the  
385 nucleus and regulate gene expression by acting as transcription factors. In addition,  
386 our findings and some other studies showed that changes in the expression of one  
387 cuticular protein-encoding genes of R&R family did not affect the expression of other  
388 members (Figure S6, S7) (Arakane *et al.* 2012; Noh *et al.* 2015). Moreover, several  
389 studies revealed that organisms optimize resources use at gene or protein expression  
390 level (Liebermeister *et al.* 2004; Dekel and Alon 2005); thus, the expression of  
391 melanin associated cuticle protein-encoding genes might be appropriately and  
392 simultaneously coordinated with the sufficient accumulation of intracellular melanin  
393 precursors, as a relatively direct, economical, efficient and convenient strategy.  
394 Furthermore, DAHP inhibits GTPCHI activity, but it does not directly impair the  
395 extracellular accumulation of melanin and protein–protein interactions in the cuticle.  
396 Finally, there is some evidence that melanin precursors regulate gene expressions via

397 the receptors (Konradi *et al.* 1996; Berke *et al.* 1998; Westin *et al.* 2001). In summary,  
398 we hypothesized that the up-regulation of the four *BmLcp* genes were induced  
399 simultaneously by excessive amounts of melanin precursors, but should not be the  
400 interaction among these four genes on regulation level. To test our hypothesis, further  
401 analyses will be performed to determine the expression of the remaining *BmLcp* genes  
402 in some *BmLcps* mutant (such as defective *BmLcp17*) cell line by increasing or  
403 decreasing the content of melanin precursors.

404 The markings in the *stony* mutant were lighter than those in the wild-type strain,  
405 and accompanied by the down-regulation of melanin synthase genes (Figure S4). If  
406 the dysfunction of some cuticular proteins cannot be effectively supplemented,  
407 abnormalities of the cuticle structure and interactions of various cuticular components  
408 may occur, which probably result in barriers for melanin deposition and metabolism.  
409 Perhaps this is the reason why the  $p^S/+^{pS}$ ,  $st/st$  (or  $p^M/+^{pM}$ ,  $st/st$ ) genotypes are lighter  
410 than the  $p^S/+^{pS}$ ,  $+^{st}/-$  (or  $p^M/+^{pM}$ ,  $+^{st}/-$ ) genotypes, besides to their different body shape.  
411 Because the homozygous of  $p^B$  mutation is lethal (Xiang 1995; Banno *et al.* 2005), we  
412 were unable to obtain F<sub>2</sub> progeny with the  $p^B/p^B$ ,  $st/st$  genotype. However, it is worth  
413 noting that the body shape and the melanism degree of  $p^B/+^{pB}$ ,  $+^{st}/st$  and  $p^B/+^{pB}$ ,  $st/st$   
414 genotype individuals were almost same (Figure 4A). Therefore, during cuticle  
415 formation, if the signal promoting melanism is sufficiently strong, plenty of melanin  
416 precursors should be generated. The contents of functionally redundant proteins  
417 induced by melanin precursors are enough to fill the gap generated by the dysfunction  
418 of some cuticular proteins in theoretically, which will be able to guarantees the normal

419 accumulation of melanin. Therefore, we believe that there should be a threshold of the  
420 melanism-promoting effect. When the accumulation of melanin precursors spans this  
421 threshold, the requirements for cuticular proteins with similar function are not  
422 weakened even when one of them loses the function, which ensuring the formation of  
423 a normal cuticle structure the later pigmentation.

424 We proposed a possible regulatory model as follows: when large amounts of  
425 melanin precursors induced by endogenous- and/or exogenous melanism-promoting  
426 factors, the melanin pathway may directly or indirectly induce the up-regulation of  
427 some cuticular protein-encoding genes to guarantee the formation of normal structural  
428 features of the melanic cuticle. During this process, if some cuticular proteins lose  
429 their functions, other functionally redundant cuticular proteins induced by melanin  
430 precursors can compensate for the functional defects. The compensatory intensity is  
431 increased with increasing melanin accumulation. When melanin accumulation spans a  
432 certain threshold, this compensation can totally mask the defective phenotype caused  
433 by the malfunctioning genes, which adds to growing evidence that melanism may  
434 have pleiotropic effects that enhance fitness over and above the effect of melanin  
435 accumulation itself (Figure 6). Due to the coexistence of excess melanin and cuticular  
436 proteins is common in other insects, and homologues the four *BmLcp* gene are widely  
437 distributed in the Lepidoptera (Table S2), we presume that the above reciprocal action  
438 and its corresponding biological significance are conserved in other Lepidoptera  
439 insects to that in *Bombyx mori*.

440 In summary, we used crucial components of the cuticle to elucidate the mutual

441 effects among some key genetic factors, and the physiological significance of these  
442 mutual effects during the development of the morphological features. Our findings not  
443 only contribute a realistic basis to in-depth study of the interaction patterns of melanin  
444 and cuticular proteins, but they will also inspire relevant studies of other Lepidopteran  
445 insects or other insect species.

446

447

#### 448 **Literature Cited**

- 449 Andersen, S. O., 2010 Insect cuticular sclerotization: a review. *Insect Biochem Mol*  
450 *Biol* 40: 166-178.
- 451 Arakane, Y., J. Lomakin, S. H. Gehrke, Y. Hiromasa, J. M. Tomich *et al.*, 2012  
452 Formation of rigid, non-flight forewings (elytra) of a beetle requires two major  
453 cuticular proteins. *PLoS Genet* 8: e1002682.
- 454 Banno, Y., H. Fujii, Y. Kawaguchi, K. Yamamoto, K. Nishikawa *et al.*, 2005 *A guide*  
455 *to the silkworm mutants: 2005 gene name and gene symbol*. Kyusyu  
456 University, Fukuoka, Japan.
- 457 Berke, J. D., R. F. Paletzki, G. J. Aronson, S. E. Hyman and C. R. Gerfen, 1998 A  
458 complex program of striatal gene expression induced by dopaminergic  
459 stimulation. *J Neurosci* 18: 5301-5310.
- 460 Chaudhari, S. S., Y. Arakane, C. A. Specht, B. Moussian, D. L. Boyle *et al.*, 2011  
461 Knickkopf protein protects and organizes chitin in the newly synthesized  
462 insect exoskeleton. *P Natl Acad Sci USA* 108: 17028-17033.
- 463 Dekel, E., and U. Alon, 2005 Optimality and evolutionary tuning of the expression  
464 level of a protein. *Nature* 436: 588-592.
- 465 Fujii, T., H. Abe, M. Kawamoto, S. Katsuma, Y. Banno *et al.*, 2013 Albino (al) is a  
466 tetrahydrobiopterin (BH<sub>4</sub>)-deficient mutant of the silkworm *Bombyx mori*.  
467 *Insect Biochem Mol Biol* 43: 594-600.
- 468 Futahashi, R., and H. Fujiwara, 2005 Melanin-synthesis enzymes coregulate  
469 stage-specific larval cuticular markings in the swallowtail butterfly, *Papilio*  
470 *xuthus*. *Dev Genes Evol* 215: 519-529.
- 471 Futahashi, R., H. Shirataki, T. Narita, K. Mita and H. Fujiwara, 2012 Comprehensive  
472 microarray-based analysis for stage-specific larval camouflage  
473 pattern-associated genes in the swallowtail butterfly, *Papilio xuthus*. *BMC*  
474 *Biol* 10: 46.
- 475 Guan, X., B. W. Middlebrooks, S. Alexander and S. A. Wasserman, 2006 Mutation of  
476 TweedleD, a member of an unconventional cuticle protein family, alters body

- 477 shape in *Drosophila*. P Natl Acad Sci USA 103: 16794-16799.
- 478 Hamadate, N., K. Noguchi, M. Sakanashi, T. Matsuzaki, J. Nakasone *et al.*, 2008  
479 Effect of decreased levels of intrinsic tetrahydrobiopterin on endothelial  
480 function in anesthetized rats. J Pharmacol Sci 107: 49-56.
- 481 He, S. Z., X. L. Tong, K. P. Lu, Y. R. Lu, J. W. Luo *et al.*, 2016 Comparative analysis  
482 of transcriptomes among *Bombyx mori* strains and sexes reveals the genes  
483 regulating melanic morph and the related phenotypes. Plos One 11.
- 484 Hopkins, T. L., and K. J. Kramer, 1992 Insect cuticle sclerotization. Annu Rev  
485 Entomol 37: 273-302.
- 486 Hu, Y. G., Y. H. Shen, Z. Zhang and G. Q. Shi, 2013 Melanin and urate act to prevent  
487 ultraviolet in the integument of the silkworm, *Bombyx mori*. Arch Insect  
488 Biochem 83: 41-55.
- 489 Jasrapuria, S., C. A. Specht, K. J. Kramer, R. W. Beeman and S. Muthukrishnan, 2012  
490 Gene families of cuticular proteins analogous to peritrophins (CPAPs) in  
491 *Tribolium castaneum* have diverse functions. Plos One 7.
- 492 Kanekatsu, R., Y. Banno, E. Nagashima and T. Miyashita, 1988 Genetical studies on a  
493 new spontaneous mutant "Bamboo" (*Bo*) of the silkworm. The Journal of  
494 Sericultural Science of Japan 57: 151-156.
- 495 Konradi, C., J. C. Leveque and S. E. Hyman, 1996 Amphetamine and  
496 dopamine-induced immediate early gene expression in striatal neurons  
497 depends on postsynaptic NMDA receptors and calcium. J Neurosci 16:  
498 4231-4239.
- 499 Liang, J., L. Zhang, Z. Xiang and N. He, 2010 Expression profile of cuticular genes of  
500 silkworm, *Bombyx mori*. BMC Genomics 11: 173.
- 501 Liebermeister, W., E. Klipp, S. Schuster and R. Heinrich, 2004 A theory of optimal  
502 differential gene expression. Biosystems 76: 261-278.
- 503 Liu, S. S., M. Wang and X. C. Li, 2015 Pupal melanization is associated with higher  
504 fitness in *Spodoptera exigua*. Sci Rep-Uk 5.
- 505 Mallet, J., and H. E. Hoekstra, 2016 Ecological genetics: a key gene for mimicry and  
506 melanism. Curr Biol 26: R802-R804.
- 507 Min, C., J. B. Song, L. I. Zhi-Quan, D. M. Tang, X. L. Tong *et al.*, 2016 Progress and  
508 perspective of silkworm as a model of human diseases for drug screening.  
509 Acta Pharmaceutica Sinica.
- 510 Moussian, B., 2010 Recent advances in understanding mechanisms of insect cuticle  
511 differentiation. Insect Biochem Mol Biol 40: 363-375.
- 512 Moussian, B., H. Schwarz, S. Bartoszewski and C. Nusslein-Volhard, 2005  
513 Involvement of chitin in exoskeleton morphogenesis in *Drosophila*  
514 *melanogaster*. J Morphol 264: 117-130.
- 515 Moussian, B., E. Tang, A. Tønning, S. Helms, H. Schwarz *et al.*, 2006 *Drosophila*  
516 Knickkopf and Retroactive are needed for epithelial tube growth and cuticle  
517 differentiation through their specific requirement for chitin filament  
518 organization. Development 133: 163-171.
- 519 Nakato, H., K. Shofuda, S. Izumi and S. Tomino, 1994 Structure and developmental  
520 expression of a larval cuticle protein gene of the silkworm, *Bombyx mori*.

- 521 Biochim Biophys Acta 1218: 64-74.
- 522 Nakato, H., M. Takekoshi, T. Togawa, S. Izumi and S. Tomino, 1997 Purification and  
523 cDNA cloning of evolutionally conserved larval cuticle proteins of the  
524 silkworm, *Bombyx mori*. Insect Biochem Mol Biol 27: 701-709.
- 525 Noh, M. Y., S. Muthukrishnan, K. J. Kramer and Y. Arakane, 2015 *Tribolium*  
526 *castaneum* RR-1 cuticular protein TcCPR4 is required for formation of pore  
527 canals in rigid cuticle. Plos Genetics 11.
- 528 Noh, M. Y., S. Muthukrishnan, K. J. Kramer and Y. Arakane, 2016 Cuticle formation  
529 and pigmentation in beetles. Curr Opin Insect Sci 17: 1-9.
- 530 Okamoto, S., R. Futahashi, T. Kojima, K. Mita and H. Fujiwara, 2008 Catalogue of  
531 epidermal genes: genes expressed in the epidermis during larval molt of the  
532 silkworm *Bombyx mori*. BMC Genomics 9: 396.
- 533 Oota, K., and R. Kanekatsu, 1993 Morphological studies on the *Bamboo (Bo)* mutant  
534 of the silkworm, *Bombyx mori*. The Journal of Sericultural Science of Japan  
535 62: 448-454.
- 536 Qiao, L., G. Xiong, R. X. Wang, S. Z. He, J. Chen *et al.*, 2014 Mutation of a cuticular  
537 protein, BmorCPR2, alters larval body shape and adaptability in silkworm,  
538 *Bombyx mori*. Genetics 196: 1103-1115.
- 539 Shofuda, K., T. Togawa, H. Nakato, S. Tomino and S. Izumi, 1999 Molecular cloning  
540 and characterization of a cDNA encoding a larval cuticle protein of *Bombyx*  
541 *mori*. Comp Biochem Physiol B Biochem Mol Biol 122: 105-109.
- 542 Sobala, L. F., and P. N. Adler, 2016 The gene expression program for the formation of  
543 wing cuticle in *Drosophila*. Plos Genetics 12.
- 544 Suderman, R. J., N. T. Dittmer, M. R. Kanost and K. J. Kramer, 2006 Model reactions  
545 for insect cuticle sclerotization: cross-linking of recombinant cuticular proteins  
546 upon their laccase-catalyzed oxidative conjugation with catechols. Insect  
547 Biochem Molec 36: 610-611.
- 548 Tajiri, R., 2017 Cuticle itself as a central and dynamic player in shaping cuticle. Curr  
549 Opin Insect Sci 19: 30-35.
- 550 Tajiri, R., N. Ogawa, H. Fujiwara and T. Kojima, 2017 Mechanical control of whole  
551 body shape by a single cuticular protein obstructor-E in *Drosophila*  
552 *melanogaster*. Plos Genetics 13.
- 553 Tan, D., X. L. Tong, H. Hu, S. Y. Wu, C. L. Li *et al.*, 2016 Morphological  
554 characterization and molecular mapping of an irradiation-induced Speckled  
555 mutant in the silkworm, *Bombyx mori*. Insect Mol Biol 25: 93-104.
- 556 Tang, L., J. Liang, Z. Zhan, Z. Xiang and N. He, 2010 Identification of the  
557 chitin-binding proteins from the larval proteins of silkworm, *Bombyx mori*.  
558 Insect Biochem Mol Biol 40: 228-234.
- 559 True, J. R., 2003 Insect melanism: the molecules matter. Trends Ecol Evol 18:  
560 640-647.
- 561 Van Belleghem, S. M., P. Rastas, A. Papanicolaou, S. H. Martin, C. F. Arias *et al.*,  
562 2017 Complex modular architecture around a simple toolkit of wing pattern  
563 genes. Nat Ecol Evol 1.
- 564 Wang, L.-Y., 2013 Molecular genetic studies on the oily mutants in the silkworm,



- 565 *Bombyx mori*, pp. 43 in *Department of Agricultural and Environmental*  
566 *Biology, Graduate School of Agricultural and Life Sciences*. University of  
567 Tokyo.
- 568 Westin, J. E., M. Andersson, M. Lundblad and M. A. Cenci, 2001 Persistent changes  
569 in striatal gene expression induced by long-term L-DOPA treatment in a rat  
570 model of Parkinson's disease. *Eur J Neurosci* 14: 1171-1176.
- 571 Wilson, K., S. C. Cotter, A. F. Reeson and J. K. Pell, 2001 Melanism and disease  
572 resistance in insects. *Ecol Lett* 4: 637-649.
- 573 Wittkopp, P. J., and P. Beldade, 2009 Development and evolution of insect  
574 pigmentation: genetic mechanisms and the potential consequences of  
575 pleiotropy. *Semin Cell Dev Biol* 20: 65-71.
- 576 Wittkopp, P. J., S. B. Carroll and A. Kopp, 2003 Evolution in black and white: genetic  
577 control of pigment patterns in *Drosophila*. *Trends Genet* 19: 495-504.
- 578 Wu, S. Y., X. L. Tong, C. X. Peng, G. Xiong, K. P. Lu *et al.*, 2016 Comparative  
579 analysis of the integument transcriptomes of the black dilute mutant and the  
580 wild-type silkworm *Bombyx mori*. *Sci Rep-Uk* 6.
- 581 Xiang, Z., 1995 *Genetics and breeding of the silkworm*. Chinese Agriculture Press,  
582 Beijing, PR China.
- 583 Yoda, S., J. Yamaguchi, K. Mita, K. Yamamoto, Y. Banno *et al.*, 2014 The  
584 transcription factor Apontic-like controls diverse colouration pattern in  
585 caterpillars. *Nat Commun* 5: 4936.

586

## 587 **Acknowledgments**

588 We thank Dr. Tianzhu Xiong, Dr. Nathan Edelman, Dr. Jorge Eduardo Amaya  
589 Romero and Ms. Yan Yao for the valuable advices. This work was supported by the  
590 Hi-Tech Research and Development 863 Program of China (Grant No.  
591 2013AA102507), the National Natural Science Foundation of China (No. 31302038;  
592 31372379), the Natural Science Foundation Project of ChongQing (CSTC) (No.  
593 cstc2013jcyjA80022) and Par-Eu Scholars Program (20136666).

594

## 595 **Figure legends**

596 **Figure 1.** Expression of four larval cuticular protein-encoding genes in melanic and  
597 non-melanic integuments. A and B represent the gene expressions between the



598 semi-lunar marking (black box) and the non-melanic region (between the semi-lunar  
599 marking, red box) in Dazao or Dazao-*stony*, respectively. Scale bar: 2 mm. C.  
600 Comparative analysis of gene expressions in the dorsal side of abdominal segments  
601 (from the third to the fourth segment, red box) between the  $p^S$  and Dazao strains.  
602 Scale bar: 1 cm. D. Comparison of gene expressions between the second-instar *al*  
603 mutant and the Dazao strain (melanic). The red hashtag symbol indicates the Fig. 1 D  
604 we are showing is cited from the previous study of our lab group (Min *et al.* 2016)  
605 with modification. Scale bar: 2 mm. *t*-test, n=3; \*  $p < 0.05$ ; \*\*  $p < 0.01$ ; \*\*\*  $p <$   
606 0.001.

607

608 **Figure 2.** Expression of cuticular protein-encoding genes in integuments showing  
609 different degree of melanism. A and B display comparisons of degree of melanism  
610 and cuticular protein-encoding gene expression levels among four strains with mutant  
611 alleles at the *p* locus. Scale bar: 1 cm. Ratios represent the ratios of gene expression  
612 levels between two strains. Symbols (–, +, ++, and +++) represent the increment of  
613 the degree of melanism. Star represents the melanin-associated cuticular  
614 protein-encoding genes. *t*-test, n=3; \*  $p < 0.05$ ; \*\*  $p < 0.01$ .

615

616 **Figure 3.** Segregation patterns of the phenotypes of progenies from different crosses  
617 of melanic mutant strains and the *stony* strain. In the segregated progenies, the first  
618 item in the list (B,N), (B,st), (S,N), (S,st), (M,N), (M,st), (N,N) and (N,st) represents  
619  $p^B$ -,  $p^S$ -,  $p^M$ - and Normal color patterns, respectively. The second item indicates body

620 shape features marked with non-*stony* type (N) and the *stony* type (st). It is  
621 noteworthy that in (S, st-am+) and (M, st-am+), the second item represents the  
622 ambiguous *stony* body shape. The size of “+” symbol represents the corresponding  
623 degree of the ambiguous *stony* body shape. Superscript “T”s represent theoretical  
624 values. Superscript “A”s represent actual values. Backslashes indicates that a value  
625 was not obtained. Chi-squared test, \*  $p < 0.05$ ; \*\*  $p < 0.01$ .

626

627 Figure 4. Association analysis of the genotypes, phenotypes and gene expression  
628 levels in segregated progenies from different crosses. A. Correlation analysis between  
629 the genotypes and phenotypes in self-crossed or backcrossed progenies. Scale bar: 1  
630 cm. White and red stars represent polymorphic bands at the  $+^p$  and  $p^X$  loci ( $X = B, S$  or  
631  $M$ ), respectively. Red and white hash-tag represent polymorphic bands at the *st* and  $+^{st}$   
632 locus, respectively. Solid and dotted red arrows indicate the relative degree of bulging  
633 (solid > dotted), respectively. Slashes show the genotypes within one phenotypic  
634 category. The thickness of the slash represents the proportion of the corresponding  
635 genotypes. Dotted backslashes indicate that the number of individuals with the  
636 corresponding genotype is quite low. B. Ratios of the length of internodes and  
637 intersegmental folds in the second, third, and fourth abdominal segments of  
638 individuals with different genotypes (showing melanic body color) in the self-crossed  
639 or backcrossed progenies.  $n \geq 3$ ,  $t$ -test, \*\*  $p < 0.01$ . C. Gene expression analysis of  
640 cuticular protein-encoding genes in homogeneous and heterogeneous individuals at  
641 the  $p$  locus from self-crossed progenies of  $p^S \times stony$ , and  $p^M \times stony$  under the

642 condition that the cuticle was melanic and the genotype was homozygous recessive at  
643 *st* locus.  $n = 3$ ,  $t$ -test, \*  $p < 0.05$ ; \*\*  $p \leq 0.01$ .

644

645 Figure 5. Effect of melanin precursors (top left: in cells) and BH<sub>4</sub> (top right: in *vivo*)  
646 treatments on the expression of cuticular protein-encoding genes ( $t$ -test;  $n = 3$ , \*  $p <$   
647  $0.05$ ; \*\*  $p < 0.01$ ), and variations of gene expression levels in larval cuticle treated  
648 with the inhibitor DAHP (bottom).  $n = 3$ ,  $t$ -test, \*\*  $p < 0.01$ .

649

650 **Figure 6.** Schematic overview of the effect of melanin precursors on the expressions  
651 of cuticular protein-encoding genes. Black solid circles represent the melanin.  
652 Triangles represent the *BmLcps* with similar expression patterns and functions. Solid  
653 and hollow triangles represent the normal and defective functions, respectively. Red  
654 rhombi represent other components (such as chitin) in the cuticle. Solid and dotted  
655 double-headed arrows indicate probable interactions and loss of interactions due to  
656 the functional deficiency of some *BmLcps* (such as dysfunctional *BmLcp17*),  
657 respectively. Purple arrows show the direction in which the melanin precursors or  
658 cuticular proteins flow from the haemolymph to the epidermal cells as well as from  
659 the epidermal cells to the cuticle. Red arrows indicate the increased contents of  
660 melanin precursors or the up-regulation of cuticular protein-encoding genes. Purple  
661 polyline arrows indicate melanism-promoting factors produced by other genetic  
662 instructions. Double dovetail arrows indicate the effect of melanin precursors on  
663 cuticular protein-encoding genes. The question mark indicates that the details of

664 induction (directly or indirectly) are unclear. Here the cuticle especially means the

665 exo-cuticles in which the melanin and cuticular proteins deposited in (Hopkins and

666 Kramer 1992; Suderman *et al.* 2006; Andersen 2010; Moussian 2010).

667

Figure 1

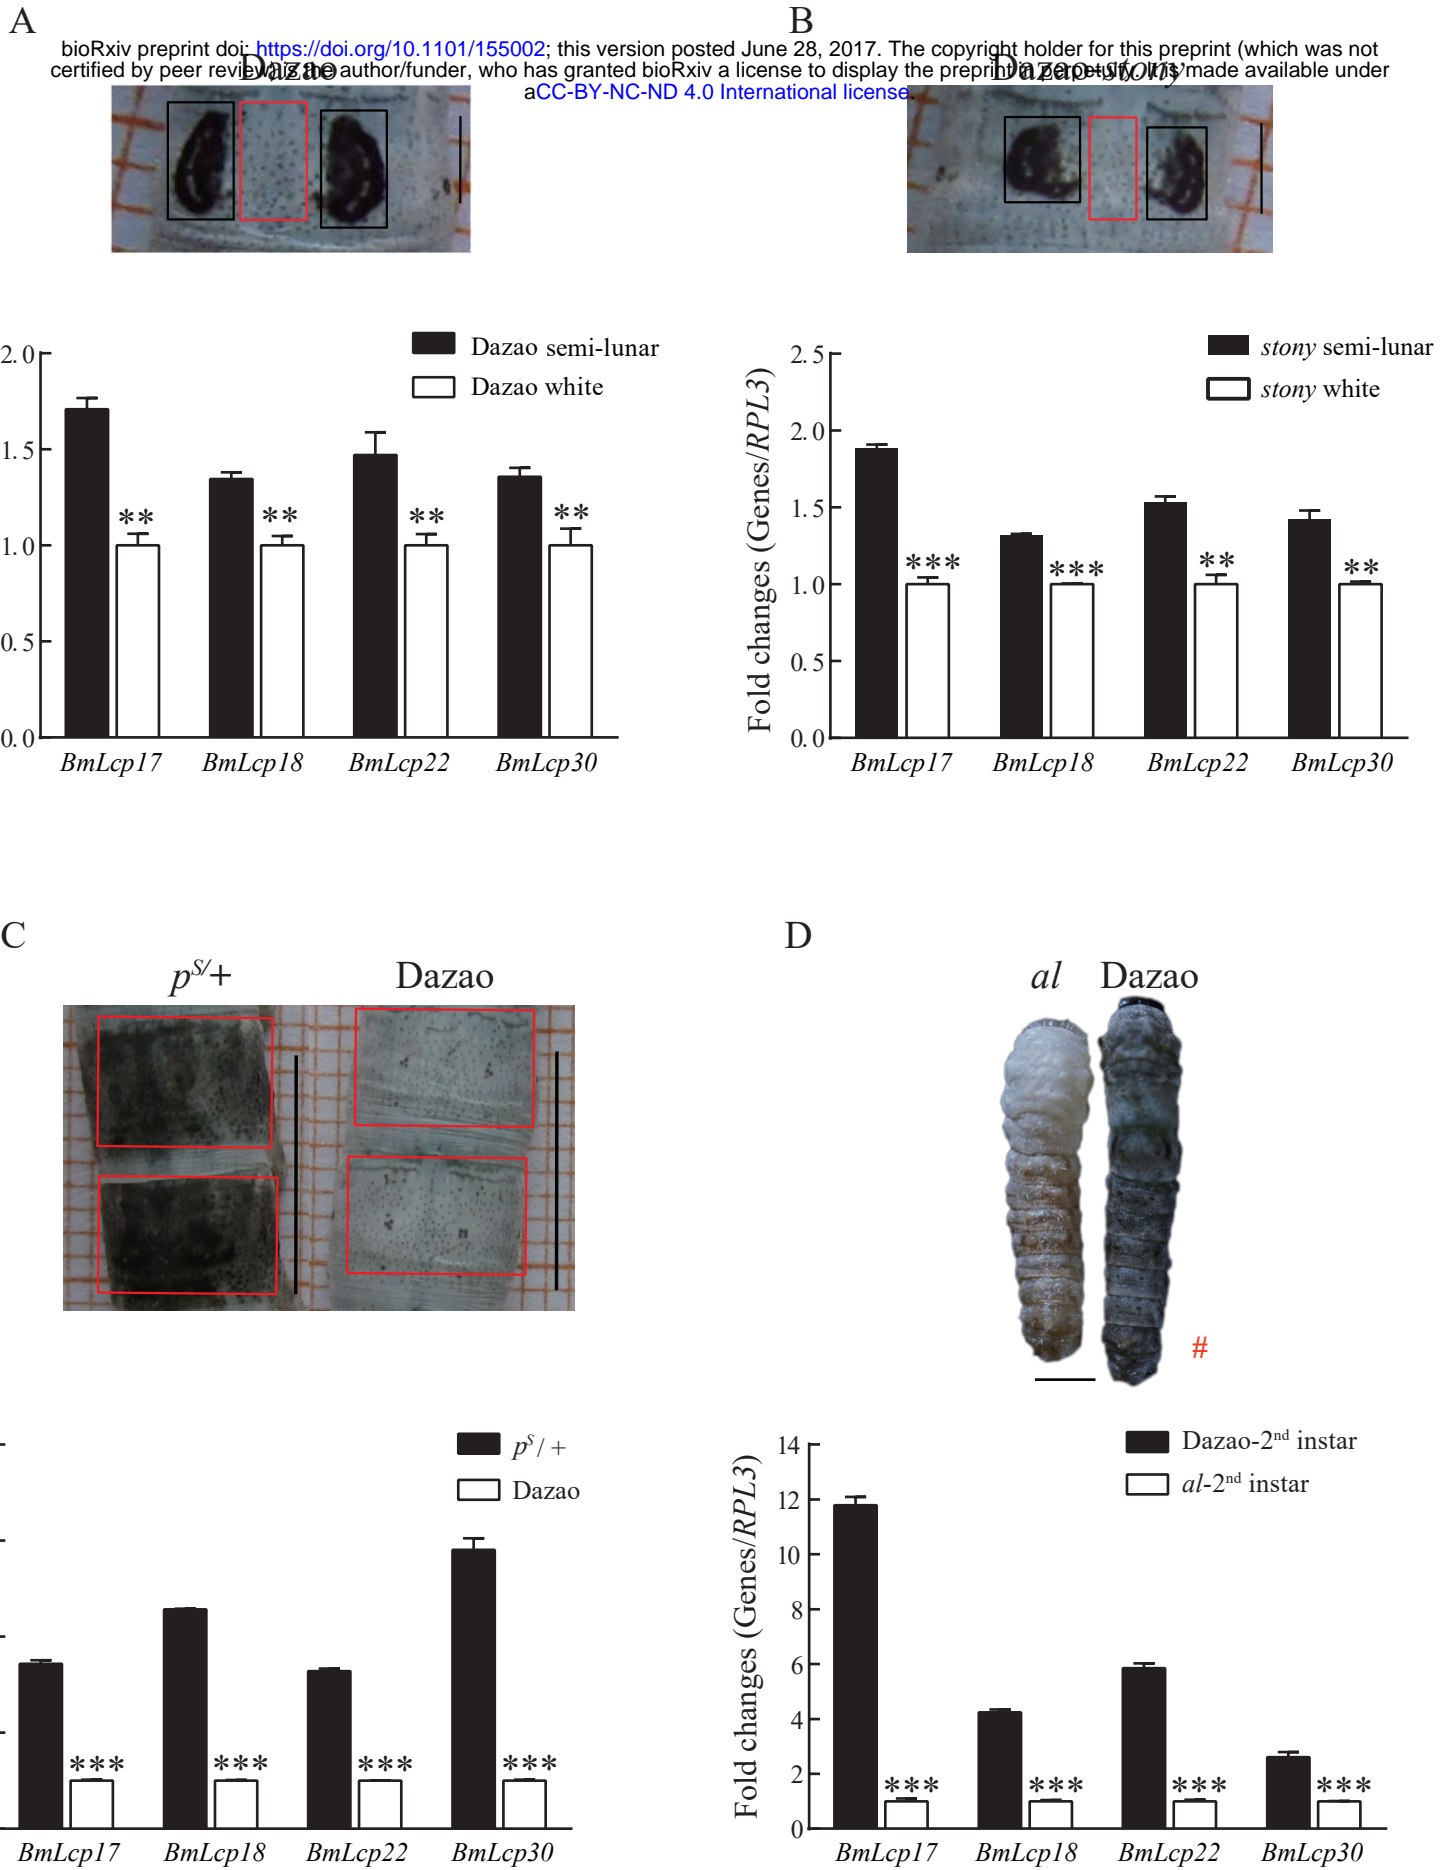

Figure 2

A

bioRxiv preprint doi: <https://doi.org/10.1101/155002>; this version posted June 28, 2017. The copyright holder for this preprint (which was not certified by peer review) is the author/funder, who has granted bioRxiv a license to display the preprint in perpetuity. It is made available under aCC-BY-NC-ND 4.0 International license.

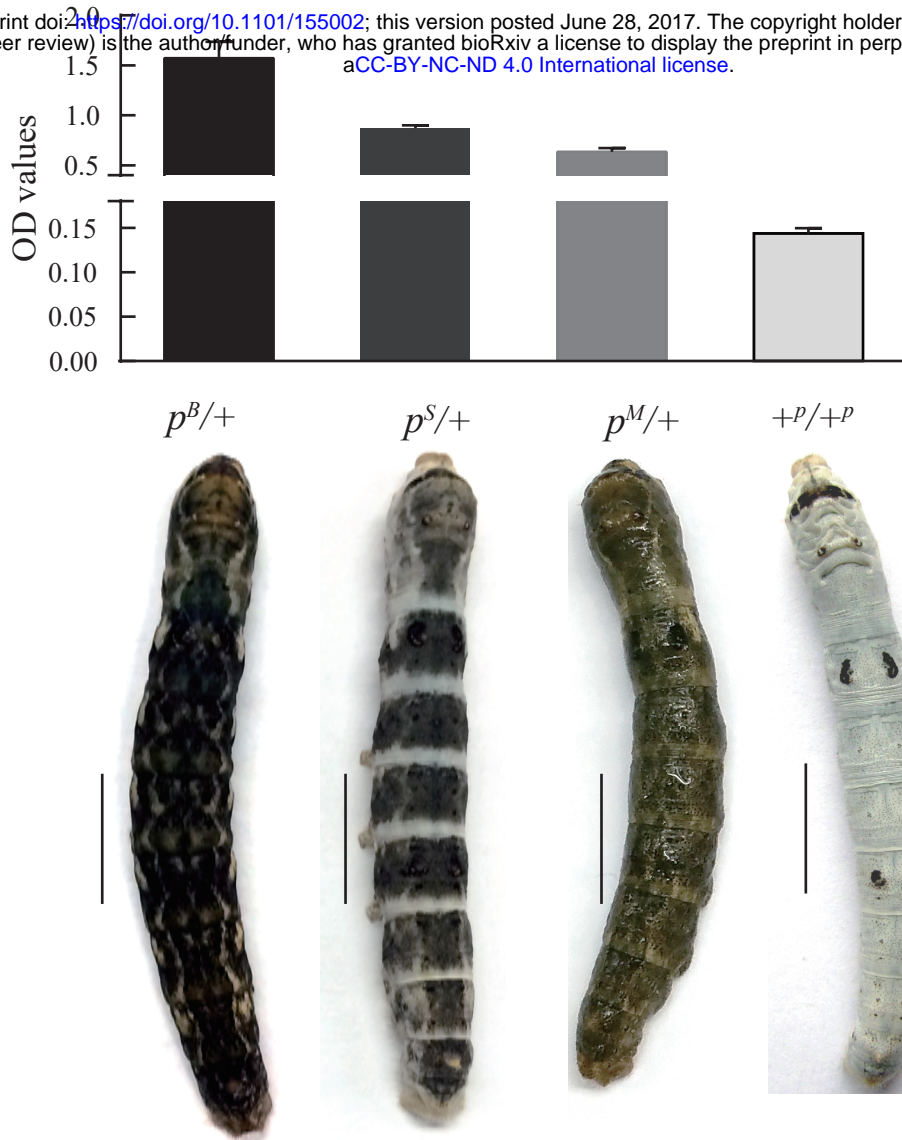

B

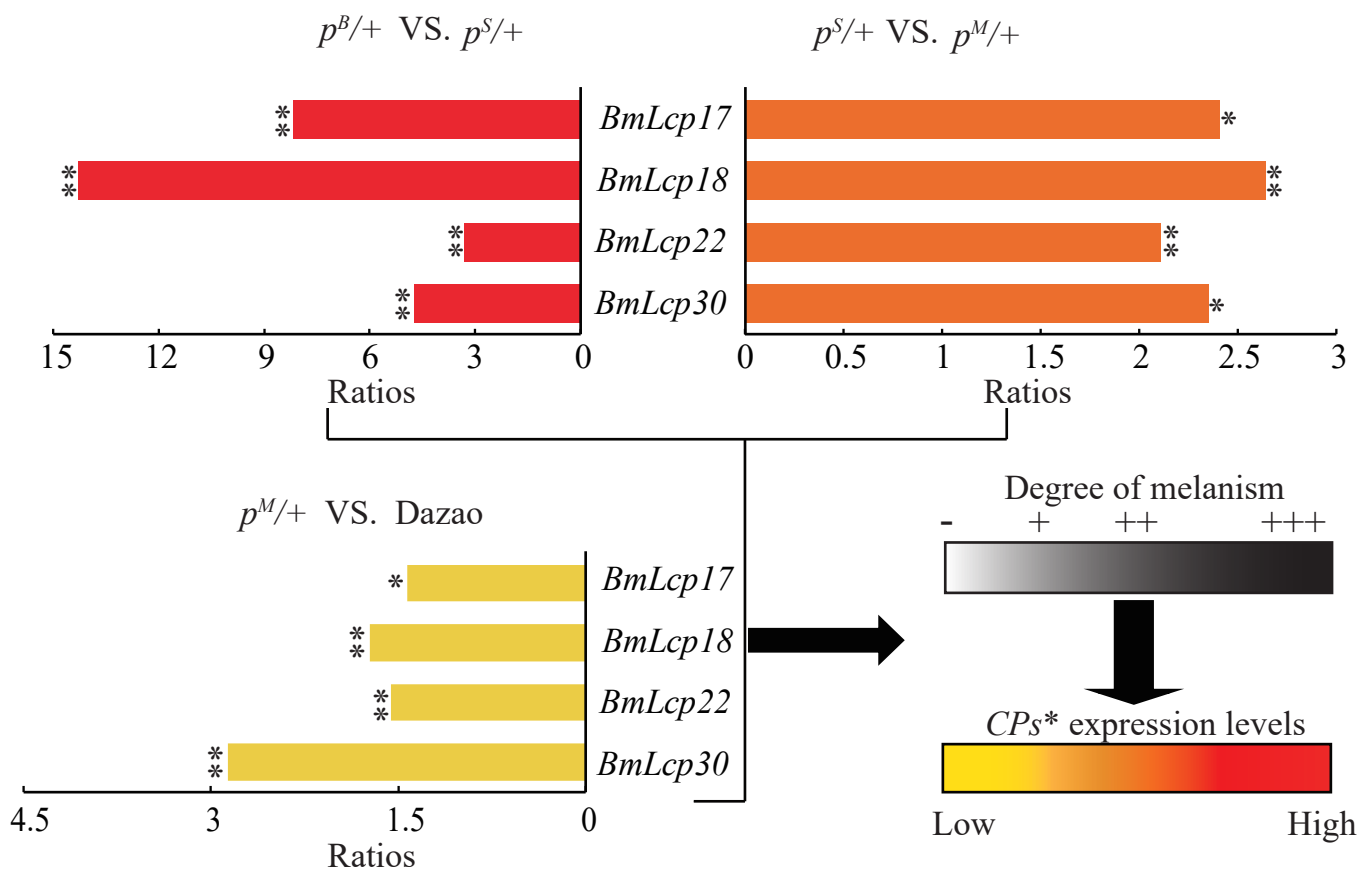

Figure 3

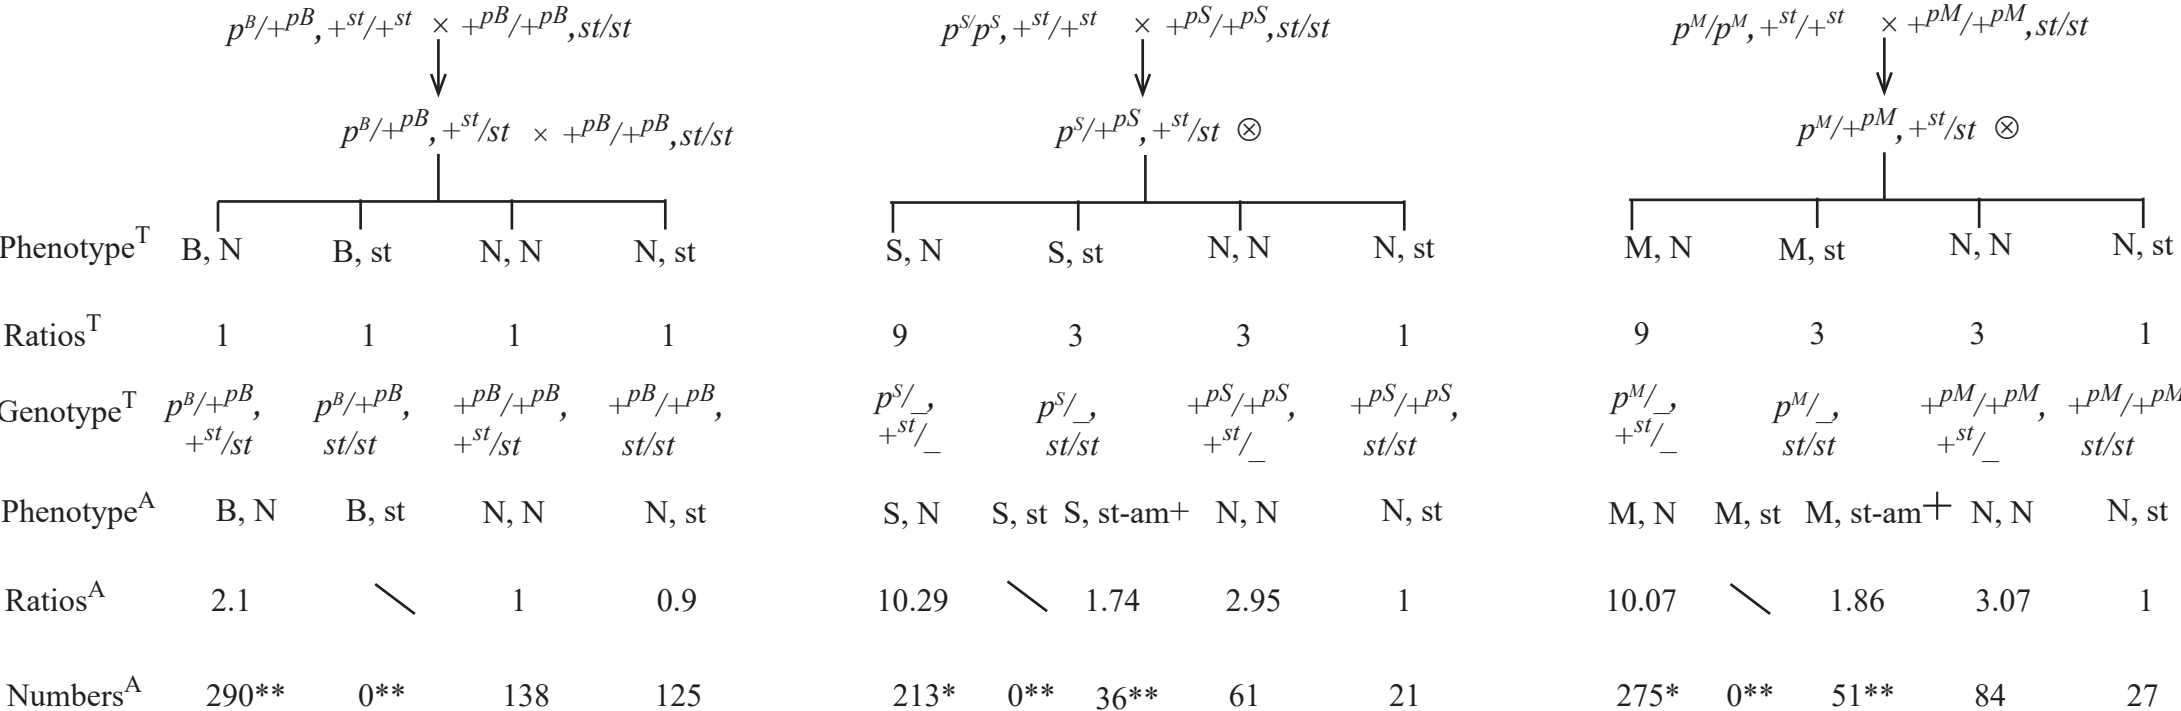



Figure 4

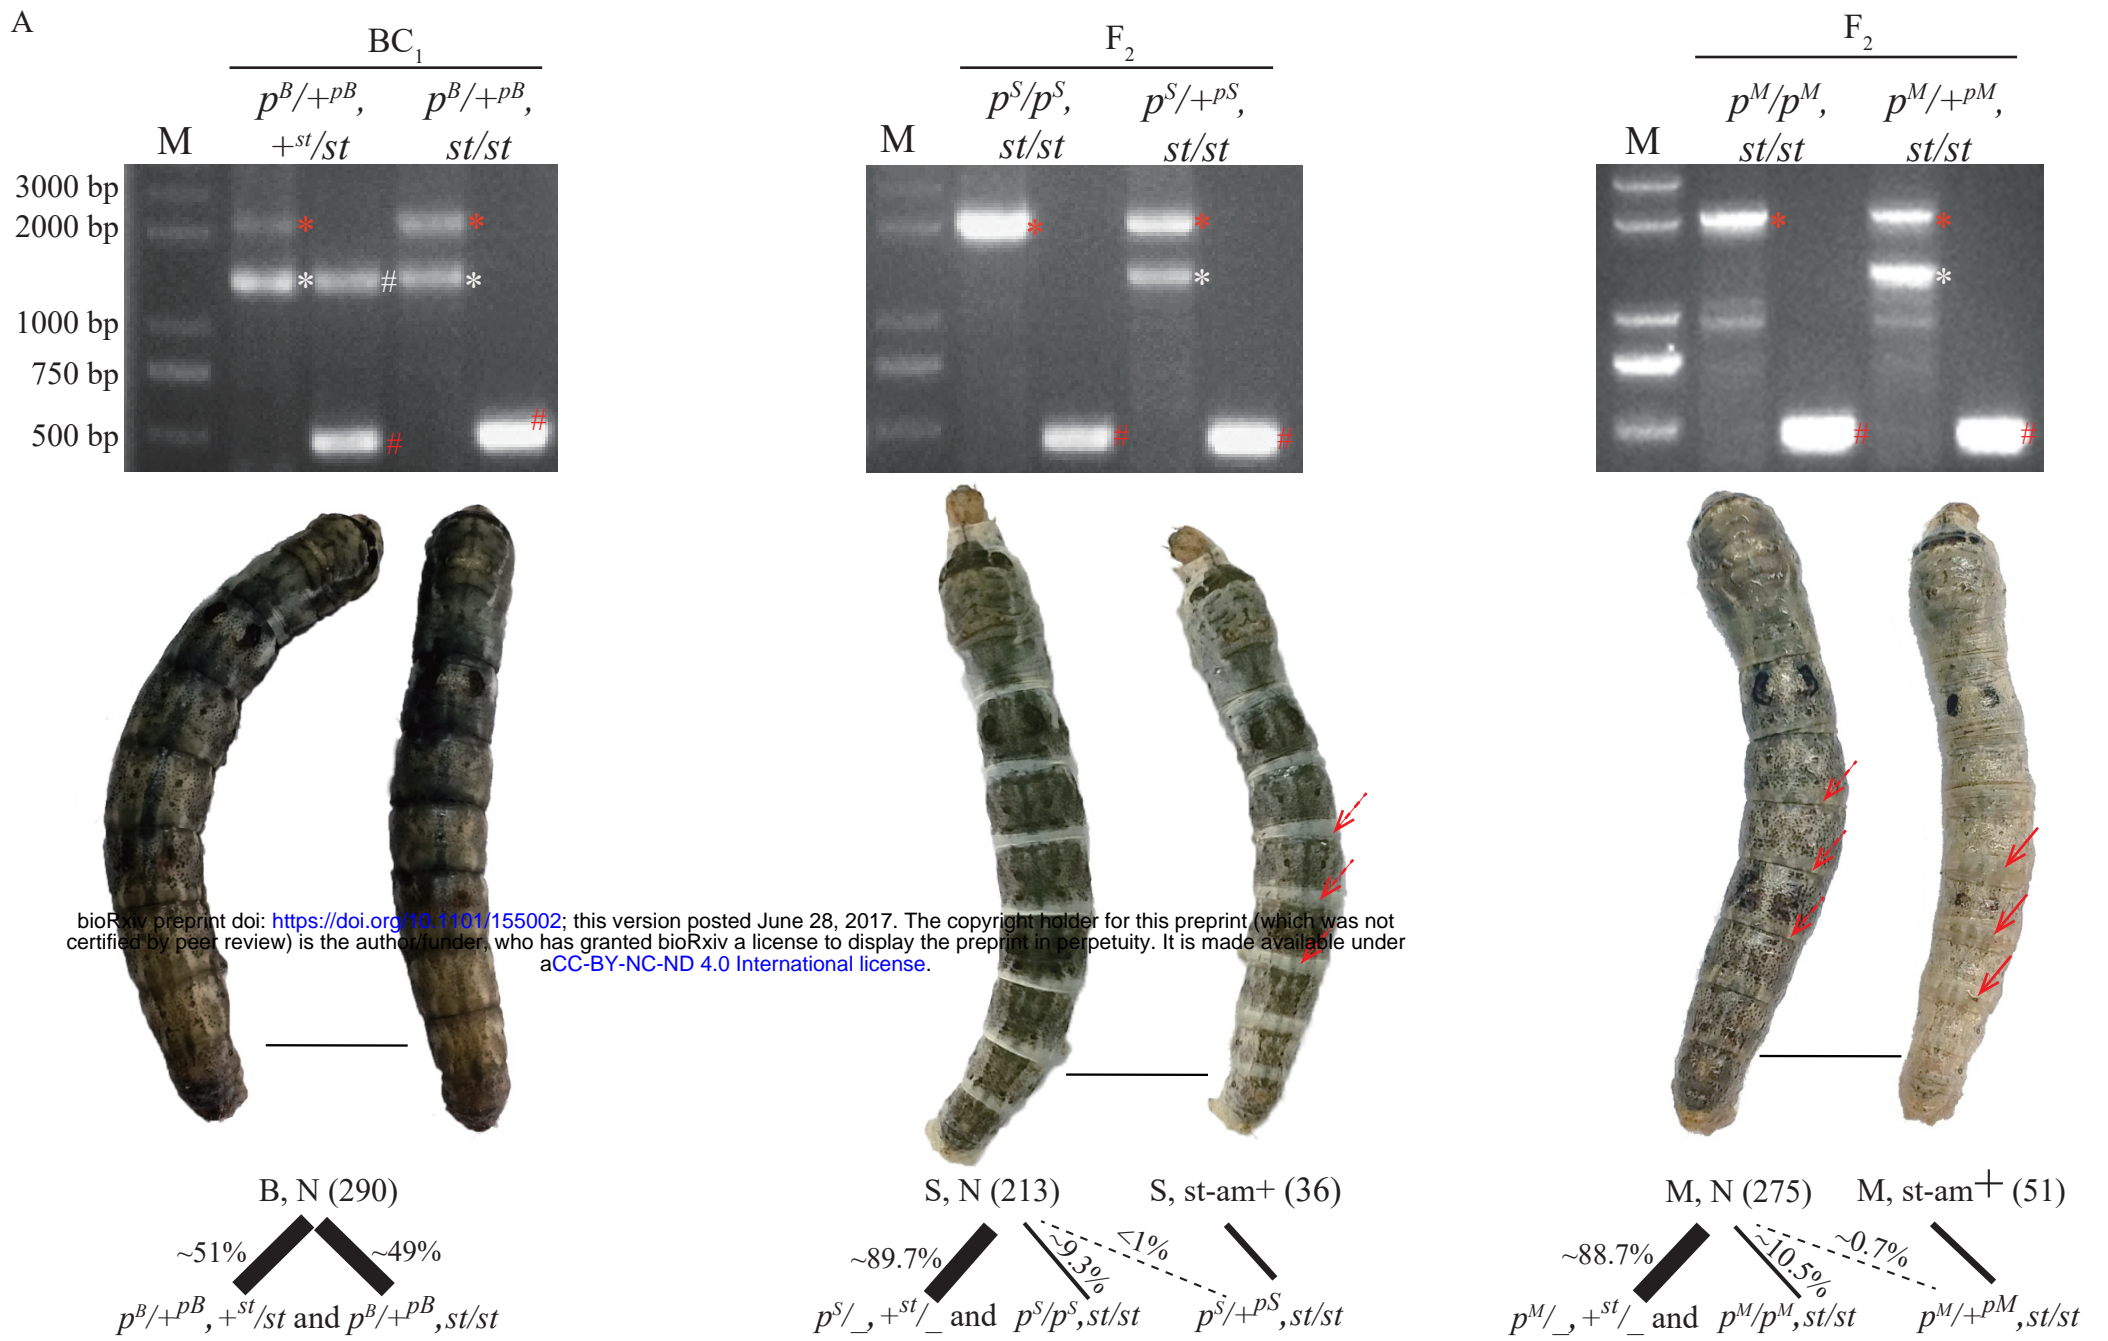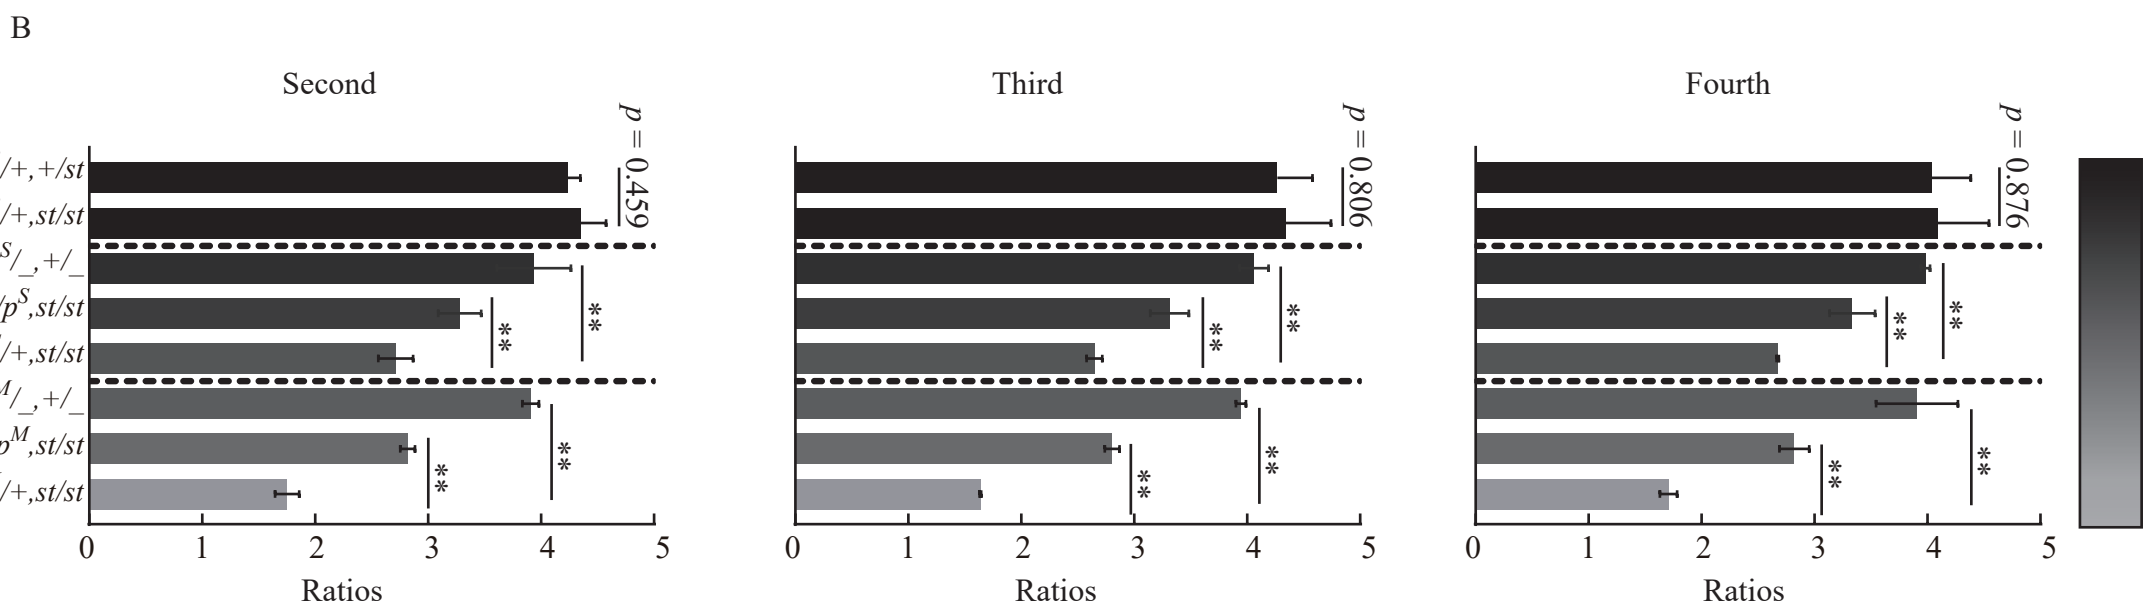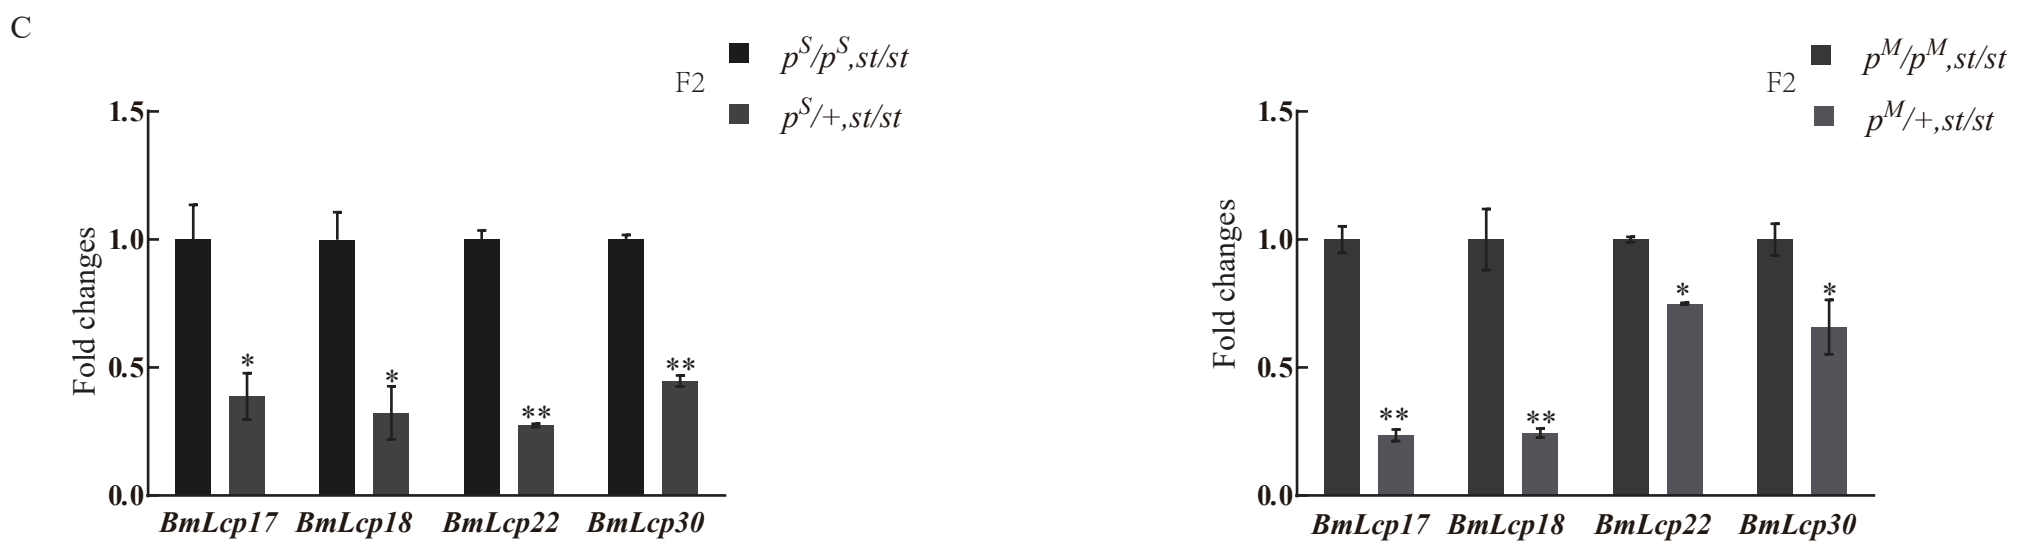



Figure 5

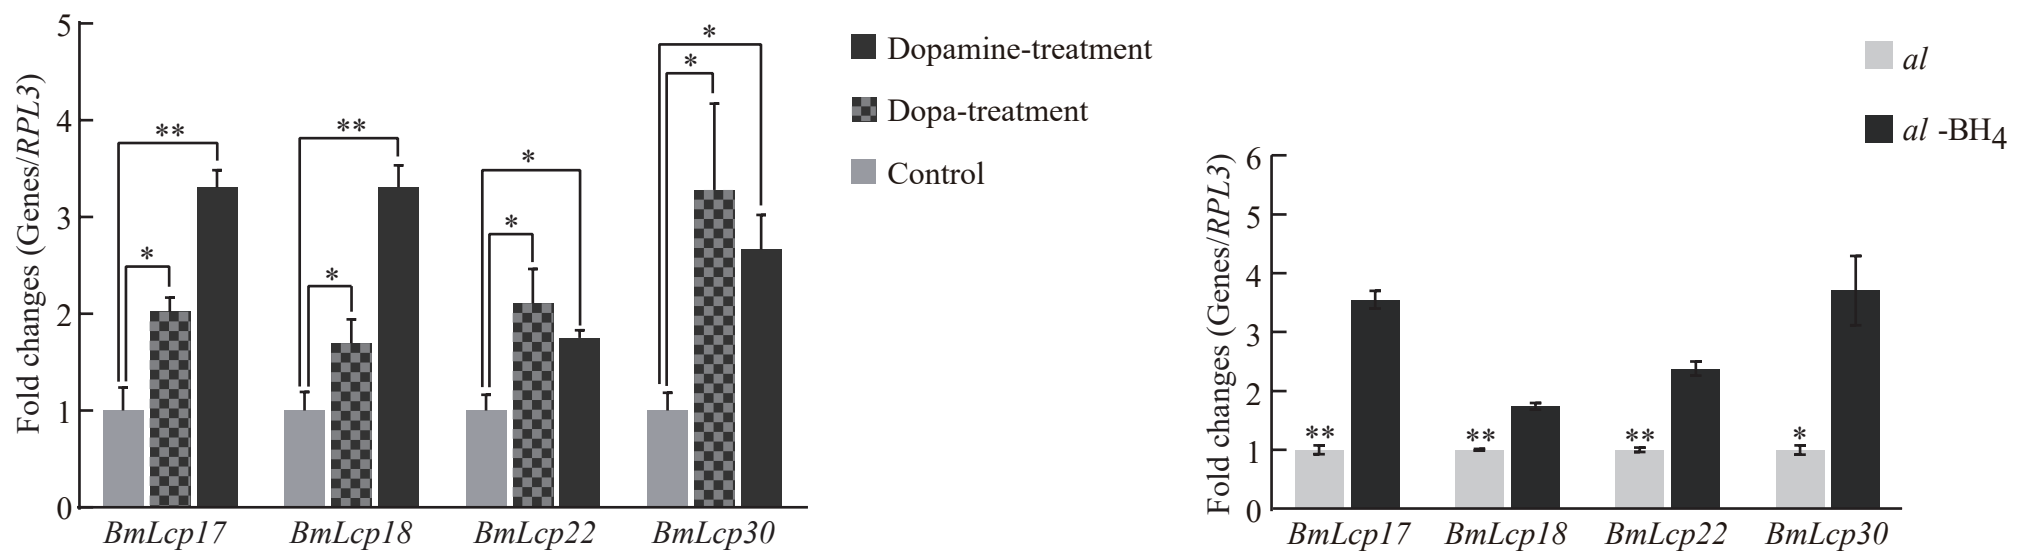

Contents of melanin precursors

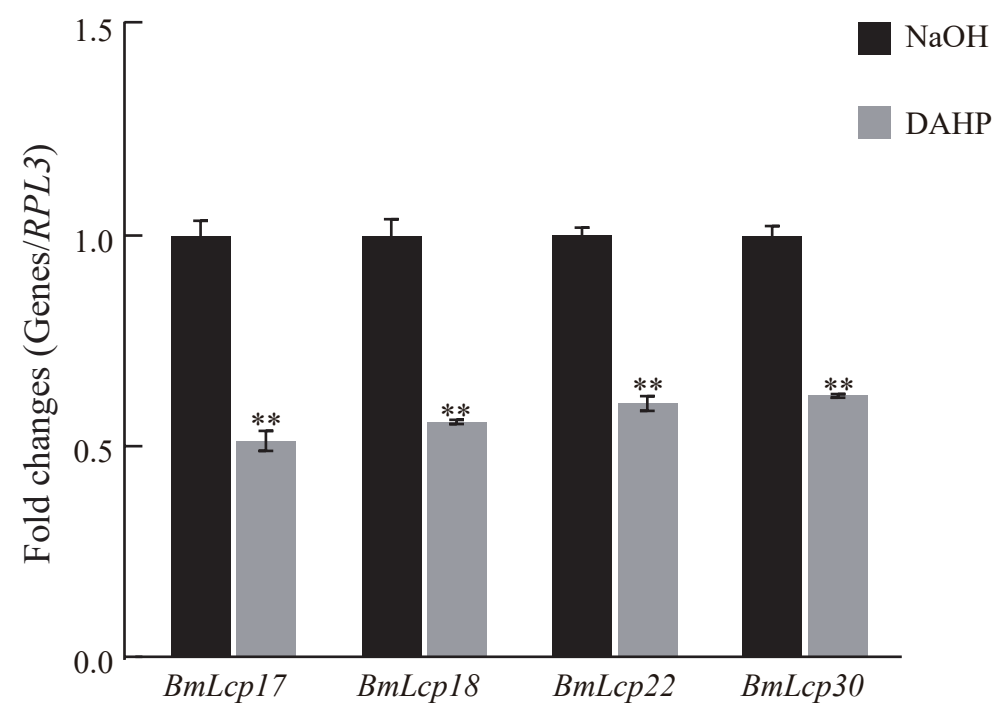

Figure 6

bioRxiv preprint doi: <https://doi.org/10.1101/155002>; this version posted June 28, 2017. The copyright holder for this preprint (which was not certified by peer review) is the author/funder, who has granted bioRxiv a license to display the preprint in perpetuity. It is made available under aCC-BY-NC-ND 4.0 International license.

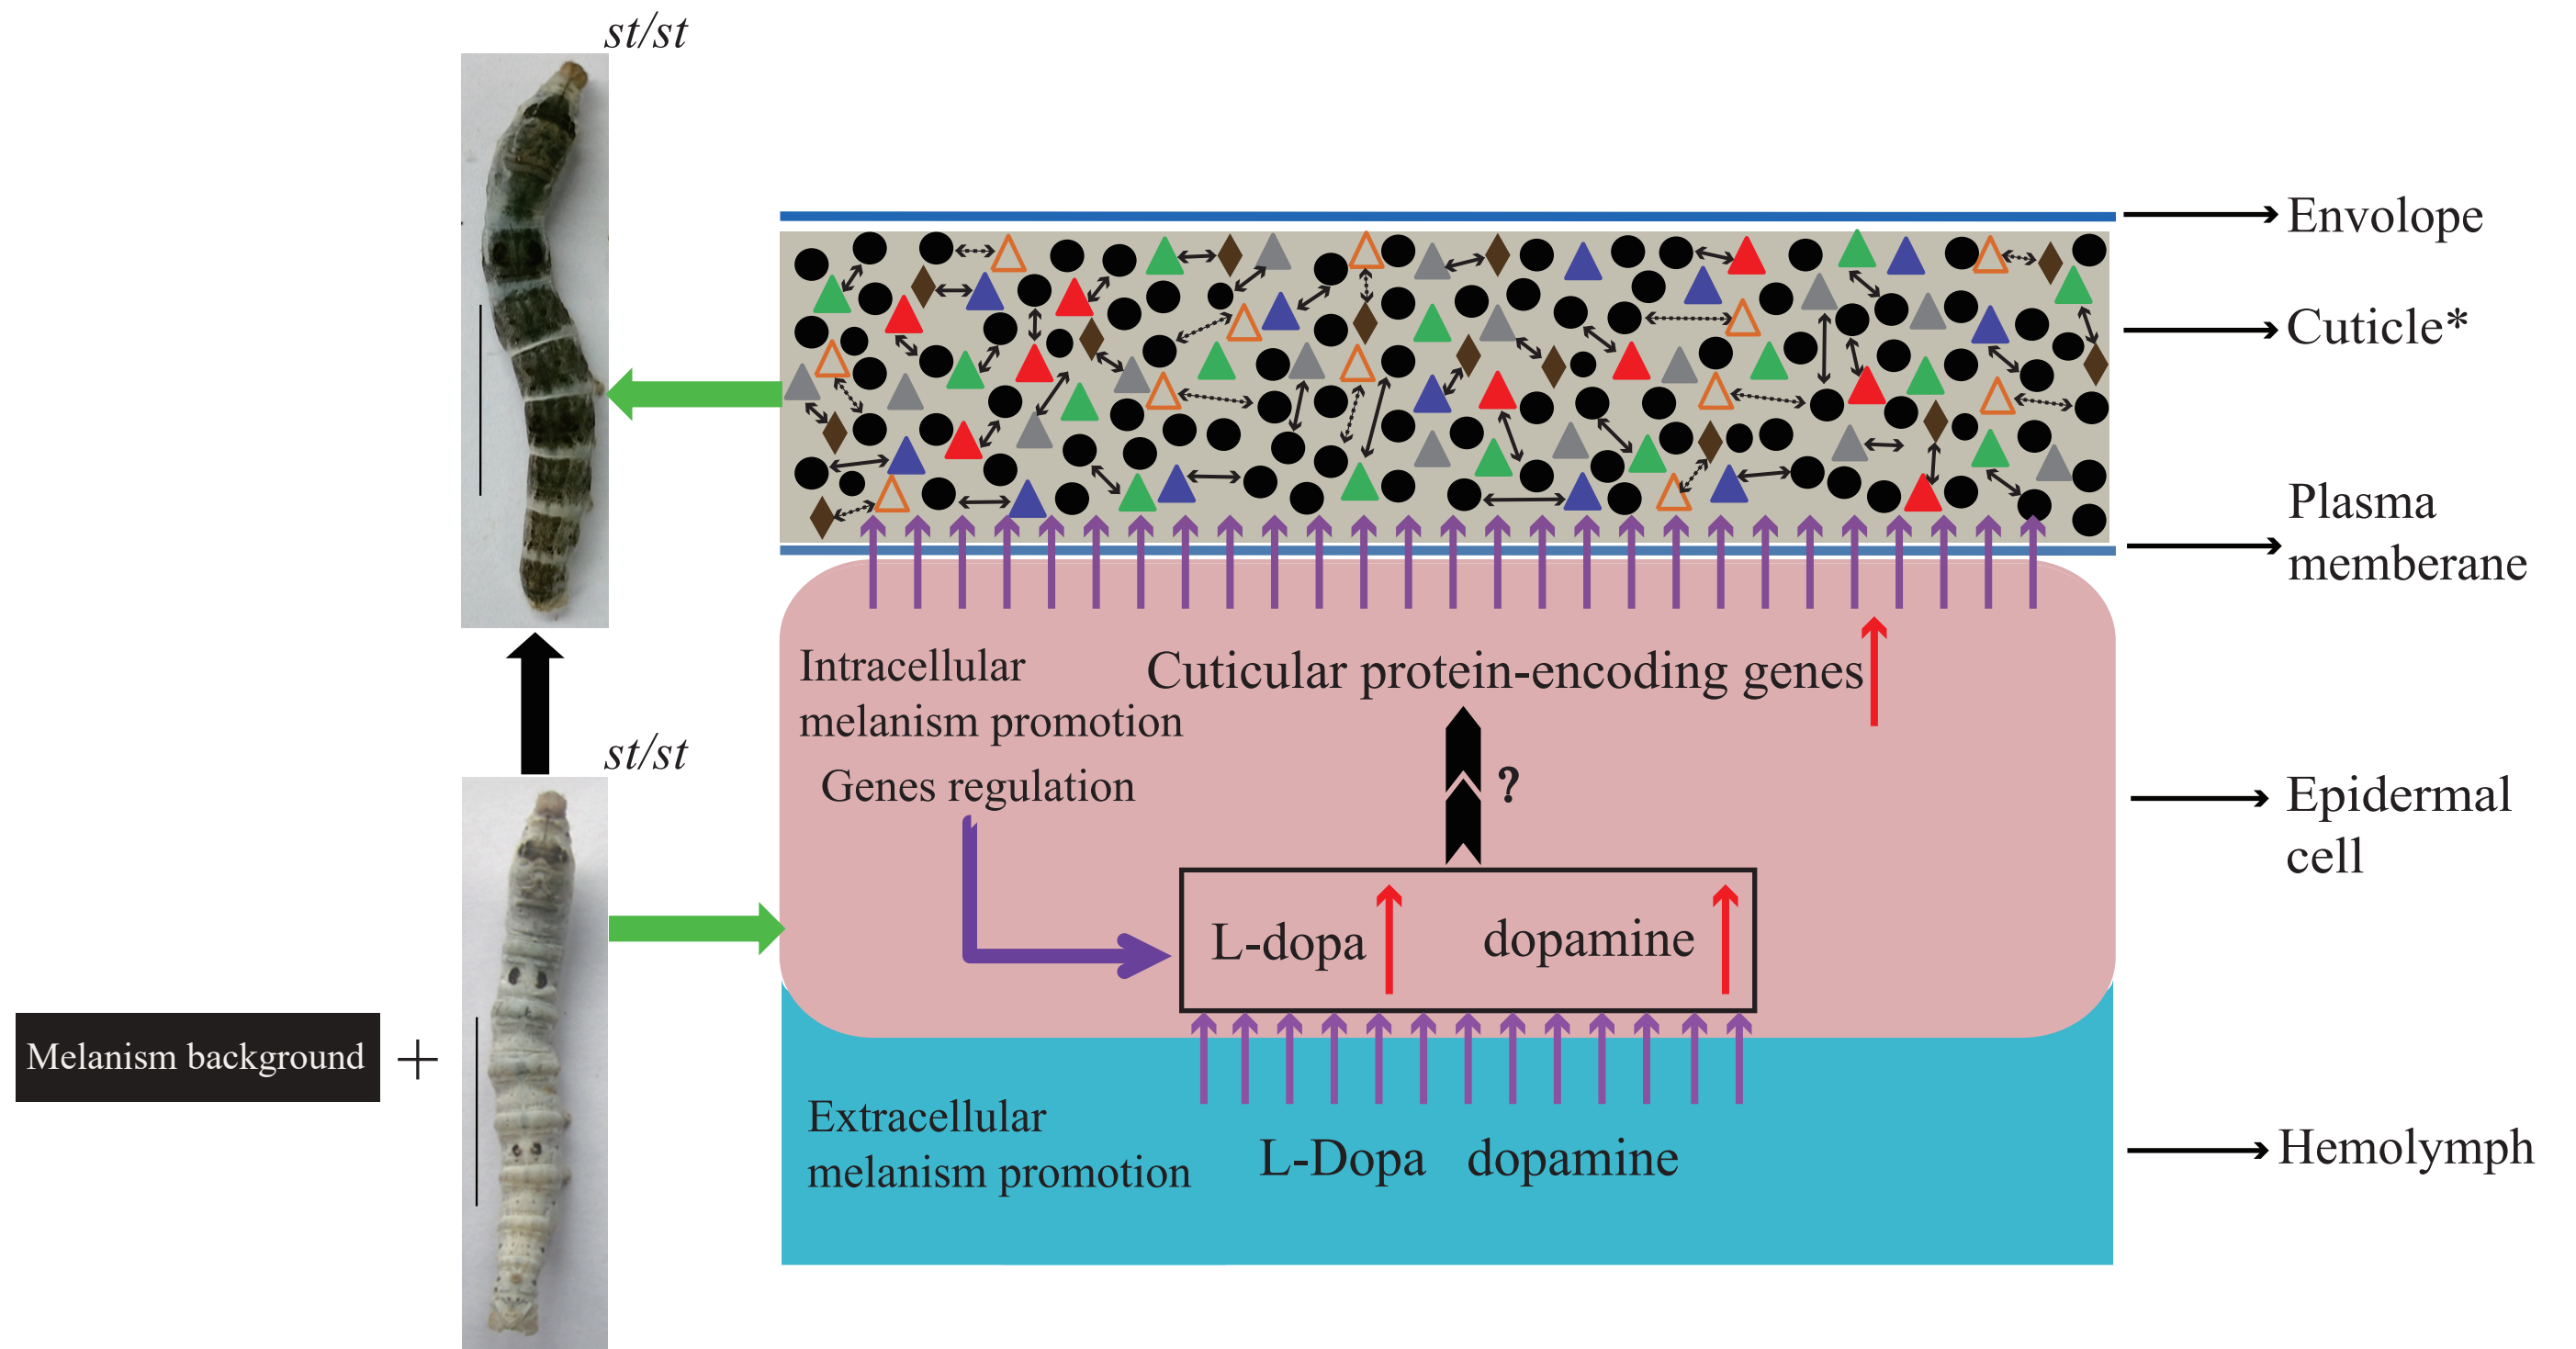

Source: https://www.biorxiv.org/content/10.1101/155002v3.full.pdf
